# Supplementary material for: Pleomorphic adenomas and mucoepidermoid carcinomas of the breast are underpinned by fusion genes
Source: PubMed Central journal article supplement (PMC7275089; doi:10.1038/s41523-020-0164-0), 2020-06-05
Supplement: 41523_2020_164_MOESM1_ESM.pdf [file 41523_2020_164_MOESM1_ESM.pdf]

**SUPPLEMENTARY MATERIALS**

**Pleomorphic adenomas and mucoepidermoid carcinomas of the breast are  
underpinned by fusion genes**

Pareja et al.

**Supplementary Tables 1-3**

**Supplementary Table 1. Fusion genes identified in three breast pleomorphic adenomas and a breast mucoepidermoid carcinoma.**

| <b>Case ID</b> | <b>Histology</b>         | <b>Oncogenic fusion genes identified by RNA-sequencing</b> | <b>Oncogenic fusion gene identified by Archer FusionPlex</b> | <b><i>PLAG1/HMGA2</i> rearrangement detected by FISH</b> | <b><i>CRTC1-MAML2</i> fusion gene detected by FISH</b> |
|----------------|--------------------------|------------------------------------------------------------|--------------------------------------------------------------|----------------------------------------------------------|--------------------------------------------------------|
| BPA1           | Pleomorphic adenoma      | None                                                       | NT                                                           | No                                                       | NT                                                     |
| BPA2           | Pleomorphic adenoma      | NT                                                         | <i>CTNNB-PLAG1</i>                                           | Yes ( <i>PLAG1</i> )                                     | NT                                                     |
| BPA3           | Pleomorphic adenoma      | <i>HMGA2-WIF1</i>                                          | NT                                                           | NT                                                       | NT                                                     |
| BMEC2          | Mucoepidermoid carcinoma | <i>CRTC1-MAML2</i>                                         | NT                                                           | NT                                                       | Yes                                                    |

FISH, fluorescence *in situ* hybridization; NT, not tested.

**Supplementary Table 2: Fusion candidate genes identified by RNA-sequencing and Archer FusionPlex in the breast pleomorphic adenomas and mucoepidermoid carcinoma included in this study.**

| Case ID | Fusion Caller (RNA-seq)/Archer FusionPlex | 5' Gene       | 3' Gene      | 5' Mapping   | 3' Mapping   | Fusion Type       | Crossing Reads | Encompassing Reads | In-Frame | Driver Probability (Oncofuse) |
|---------|-------------------------------------------|---------------|--------------|--------------|--------------|-------------------|----------------|--------------------|----------|-------------------------------|
| BPA3    | STAR-Integrate, FusionCatcher, Defuse     | <i>WIF1</i>   | <i>HMGA2</i> | 12:66232350+ | 12:66232349- | Intra-Chromosomal | 56             | 145                | No       | 0.024531268                   |
| BMEC2   | STAR-Integrate, FusionCatcher, Defuse     | <i>CRTC1</i>  | <i>MAML2</i> | 19:18794638+ | 11:95826681- | Inter-Chromosomal | 4              | 7                  | No       | 0.128278142                   |
| BPA2    | Archer FusionPlex                         | <i>CTNNB1</i> | <i>PLAG1</i> | 3:41241161+  | 8:57083748-  | Inter-Chromosomal | 6              | 25                 | Yes      | 0.995056115                   |

**Supplementary Table 3. Primer sets for validation of candidate fusion genes by RT-PCR**

| <b>Fusion gene</b> | <b>Primer set</b> | <b>Primer direction</b> | <b>Primer ID</b> | <b>Primer sequence</b> |
|--------------------|-------------------|-------------------------|------------------|------------------------|
| <i>HMGA2-WIF1</i>  | Set #1            | Forward                 | HW-1-Fwd         | AATGACTTCCTTTTTCATTTGC |
|                    |                   | Reverse                 | HW-1-Rv          | TTAAGTGAAGGCGTGTGCTG   |
| <i>HMGA2-WIF1</i>  | Set #2            | Forward                 | HW-2-Fwd         | AATGTGTCCCTTGGTGCAAGT  |
|                    |                   | Reverse                 | HW-2-Rv          | TTAAGTGAAGGCGTGTGCTG   |
| <i>CRTC1-MAML2</i> | Set #1            | Forward                 | CM-1-Fwd         | GCTGCACAATCAGAAGCAG    |
|                    |                   | Reverse                 | CM-1-Rv          | TGAGTTGTCCACAAAGCCATT  |
| <i>CRTC1-MAML2</i> | Set #2            | Forward                 | CM-2-Fwd         | CGGAAATTCAGCGAGAAGAT   |
|                    |                   | Reverse                 | CM-2-Rv          | TGAGTTGTCCACAAAGCCATT  |
